1 **Leveraging regulatory monitoring data for quantitative microbial risk**  
2 **assessment of *Legionella pneumophila* in cooling towers**

3 Émile Sylvestre<sup>1,2\*</sup>, Dominique Charron<sup>2</sup>, Xavier Lefebvre<sup>3</sup>, Emilie Bedard<sup>4</sup>, Michèle Prévost<sup>2</sup>

4 <sup>1</sup> Sanitary Engineering, Delft University of Technology, Stevinweg 1, 2628 CN, Delft, the  
5 Netherlands

6 <sup>2</sup> NSERC Industrial Chair on Drinking Water, Department of Civil, Geological, and Mining  
7 Engineering, Polytechnique Montreal, Montreal, Quebec, H3C 3A7, Canada

8 <sup>3</sup> Department of Mechanical Engineering, Polytechnique Montreal, Montreal, Quebec, H3C 3A7,  
9 Canada

10 <sup>4</sup> Department of Civil, Geological, and Mining Engineering, Polytechnique Montreal, Montreal,  
11 Quebec, H3C 3A7, Canada

12 \*Corresponding author: E. Sylvestre@tudelft.nl

13

14 **Abstract**

15 Cooling towers are critical engineered water systems for air conditioning and refrigeration but  
16 can create favorable conditions for *Legionella pneumophila* growth and aerosolization. Human  
17 exposure to *L. pneumophila*-contaminated aerosols can cause Legionnaire's disease. Routine  
18 monitoring of *L. pneumophila* in cooling towers offers possibilities to develop quantitative  
19 microbial risk assessment (QMRA) to guide system design, operation, control, and maintenance.  
20 Here, we used the regulatory monitoring database from Quebec, Canada, to develop statistical  
21 models for predicting *L. pneumophila* concentration variability in cooling towers and integrate  
22 these models into a screening-level QMRA to predict human health risks. Analysis of 105,463  
23 monthly *L. pneumophila* test results revealed that the exceedance rate of the  $10^4$  colony forming  
24 unit (CFU) per liter threshold was constant at 10% from 2016 to 2020, emphasizing the need to  
25 better validate the efficacy of corrective measures following the threshold exceedances. Among  
26 2,852 cooling towers, 51.2% reported no detections, 38.5% had up to nine positives, and 10.2%  
27 over ten. The gamma or the lognormal distributions adequately described site-specific variations  
28 in *L. pneumophila* concentrations, but parametric uncertainty was very high for the lognormal  
29 distribution. We showed that rigorous model comparison is essential to predict peak  
30 concentrations accurately. Using QMRA, we found that, to meet a health-based target of  $10^{-6}$   
31 DALY/pers.-year for clinical severity infections, an average *L. pneumophila* concentration below  
32  $1.4 \times 10^4$  CFU L<sup>-1</sup> should be maintained in cooling towers. We identified 137 cooling towers at  
33 risk of exceeding this limit, primarily due to the observation or prediction of rare peak  
34 concentrations above  $10^5$  CFU L<sup>-1</sup>. Effective mitigation of those peaks is critical to controlling  
35 public health risks associated with *L. pneumophila*.

36

37 **Keywords:** *Legionella pneumophila*, cooling towers, quantitative microbial risk assessment  
38 (QMRA), aerosol transmission, water treatment

39

## 40 **1 Introduction**

41 Exposure to *Legionella pneumophila* through inhalation of aerosols produced by engineered  
42 water systems, such as cooling towers, is a common cause of Legionnaire's disease. This disease  
43 can result in a severe form of pneumonia, particularly threatening individuals who are older,  
44 have weakened immune systems, or suffer from chronic lung diseases (National Academies of  
45 Sciences and Medicine, 2020).

46 Cooling towers, engineered water systems designed to remove excess heat from buildings by  
47 cooling water, are critical for air conditioning and refrigeration but can provide ideal conditions  
48 for the growth and aerosolization of *L. pneumophila*. These systems operate using evaporative  
49 cooling. Warm water from cooling systems — usually between 29 and 35 °C, a temperature  
50 range favorable for *L. pneumophila* growth — is sprayed as fine droplets onto packing or  
51 honeycomb material. As ambient air is drawn into the cooling tower, either by natural or  
52 mechanical ventilation, a small portion of the water evaporates, reducing its temperature but also  
53 generating aerosol droplets that may carry *L. pneumophila*. While cooling towers should be  
54 equipped with drift eliminators designed to minimize aerosol droplets released into the  
55 atmosphere, the efficiency of these devices is not absolute (ASHRAE, 2008). The release of  
56 contaminated droplets into the atmosphere can pose public health risks for neighboring  
57 communities.

58 The growth of *L. pneumophila* colonies in cooling towers is influenced by various factors, such  
59 as the presence of protozoa (which serve as hosts), biofilms, nutrient availability, water  
60 temperature, and manufacturing materials (Kusnetsov et al., 1993; Paniagua et al., 2020;  
61 Türetgen and Cotuk, 2007). To minimize growth, the primary strategy involves chemical water  
62 disinfection (Kim et al., 2002). However, predicting the presence and survival of *L. pneumophila*

63 in cooling towers solely from design and operational parameters is challenging. Various risk  
64 management guidelines and guidance documents based on the hazard analysis and critical  
65 control point (HACCP) method recommend routine monitoring of *L. pneumophila* in bulk water  
66 to validate water treatment efficiency (ASHRAE, 2018; 2020; Cooling Technology Institute  
67 (CTI), 2000; World Health Organization (WHO), 2011). Legal requirements for routine  
68 monitoring of *L. pneumophila* have been established across numerous countries (Radziminski  
69 and White, 2023; Van Kenhove et al., 2019), often necessitating corrective actions when  
70 specified *L. spp* or *L. pneumophila* concentrations are exceeded. For example, Quebec's  
71 regulation requires intervention and confirmation of the effectiveness of corrective measures  
72 when the *L. pneumophila* concentration exceeds  $10^4$  colonies forming unit (CFU) L<sup>-1</sup>  
73 (Gouvernement du Québec, 2014).

74 A quantitative microbial risk assessment (QMRA) framework has been proposed to assess health  
75 risks associated with exposure to *L. pneumophila*-laden aerosols from cooling towers (Hamilton  
76 et al., 2018). This framework incorporates dose–response models to predict human health effects  
77 from the deposition of *L. pneumophila* in the lungs (Armstrong and Haas, 2007) and uses a  
78 Gaussian plume model to simulate the fate and transport of contaminated aerosol droplets (Hardy  
79 et al., 2006). Applying QMRA makes it possible to estimate public health risks based on  
80 concentrations of *L. pneumophila* in the bulk water from cooling towers. These risk predictions  
81 can be compared with health-based targets to provide a foundation for risk-based criteria to guide  
82 system design, operation, control, and maintenance (National Academies of Sciences and  
83 Medicine, 2020).

84 Within the QMRA framework proposed by Hamilton et al. (2018), the health risk is directly  
85 proportional to the concentrations of *L. pneumophila* in the bulk water of the cooling tower.

86 Extensive routine *L. pneumophila* monitoring data from programs designed to validate treatment  
87 efficiency offer a significant opportunity to develop statistical models to investigate temporal  
88 variations in these concentrations. Parametric models, such as mixed Poisson distributions, have  
89 been widely used to model temporal variations in microbial concentrations in surface water  
90 sources (Haas et al., 1999; Masago et al., 2004; Teunis et al., 1997). These distributions have  
91 also been used in ecology to describe variations in the abundance of populations governed by an  
92 environmental carrying capacity (Dennis and Patil, 1988; Dennis and Patil, 1984). Despite the  
93 apparent potential of such models, their application to model routine monitoring *L. pneumophila*  
94 data remains unexplored. Bridging this gap could facilitate the development of more transparent,  
95 risk-based strategies for *L. pneumophila* risk assessment and management.

96 The objectives of our study are to i) develop candidate statistical models to predict the variability  
97 and uncertainty in *L. pneumophila* concentrations obtained from routine monitoring of bulk  
98 water in cooling towers, ii) establish a framework for model comparison and selection and  
99 implement it for an extensive database, and iii) incorporate selected models within a screening-  
100 level QMRA model to predict human health risks associated with exposure to droplet aerosols  
101 generated by a representative cooling tower.

102

## 103 **2 Methodology**

### 104 **2.1 Database**

105 In Quebec, *L. pneumophila* monitoring is required by the regulation for the maintenance of  
106 cooling towers (Gouvernement du Québec, 2014). We obtained the Quebec regulatory database,  
107 which includes *L. pneumophila* monitoring results for 2852 cooling towers (1960 buildings) in  
108 Quebec, Canada. For each cooling tower, the database consists of results from monthly  
109 monitoring of *L. pneumophila* concentrations in bulk water obtained yearly or on a seasonal  
110 basis from 2016 to 2020. It also includes general system information, including the building  
111 type, usage type, service period, and location. Specific information on water treatment (types of  
112 biocides used, application frequencies, dosages, etc.) was unavailable. The regulation defines an  
113 action level of  $10^4$  colony-forming units (CFU) L<sup>-1</sup> and a human health risk level of  $10^6$  CFU L<sup>-1</sup>.  
114 Upon exceedance of the action level, the regulation requires immediate corrective intervention.  
115 A strict decontamination procedure must be applied when the concentration of *L. pneumophila* is  
116 equal to or greater than  $10^6$  CFU L<sup>-1</sup>. Additional *L. pneumophila* results following a  
117 decontamination procedure were included in the database for some cooling towers, following  
118 testing requirements. However, these results could not be differentiated from routine monitoring  
119 results.

### 120 **2.2 Sample collection and *L. pneumophila* enumeration**

121 Each sample was collected and stored following Standard DR-09-11 (Centre d'expertise en  
122 analyse environnementale du Québec, 2022). *L. pneumophila* enumeration was performed using  
123 culture-based methods adapted from AFNOR NF T90-431 or ISO 11731:2017, depending on the  
124 laboratory conducting the analyses. Diluted samples were spread on glycine vancomycin  
125 polymyxin cycloheximide agar medium (GVPC) or BMPA, with or without acid (pH 2; 5  
126 minutes) or heat (50 °C; 30 minutes) pre-treatment or a combination of acid and heat. Samples

127 were then incubated at 36 °C for 8-11 days, and presumptive colonies of *Legionella* spp. were  
128 grown with buffered charcoal yeast extract (BCYE) supplemented or not with cysteine at 36 ±  
129 1.5 °C for 3-5 days. *L. pneumophila* species were identified, in most cases, by a latex  
130 agglutination test, and all results were expressed as CFU. Results at the detection limit were  
131 reported in CFU L<sup>-1</sup> calculated as 1 CFU per volume of sample tested.

### 132 **2.3 Estimation of *L. pneumophila* counts from reported concentrations**

133 Statistical inference was not made directly from reported concentrations since treating detection  
134 limits as actual microbial concentrations or as censored data can significantly bias statistical  
135 analyses (Chik et al., 2018).

136 We developed an approximation method to estimate the colony numbers and assayed water  
137 volumes for each reported concentration. Initially, for concentrations reported at the detection  
138 limit, we calculated the tested volume ( $V_i$ ) for each instance ( $i$ ) using the formula:

$$V_i = \frac{1}{C_{LD,i}} \quad \text{for } i = 1, \dots, j \quad (1)$$

139 where  $C_{LD,i}$  represents the detection limit and  $j$  is the count of these instances in the database.

140 Subsequently, for each detected concentration ( $C_{\text{detected},m}$ ), we computed the corresponding  
141 number of colonies ( $k_{i,m}$ ) by applying the previously determined volume ( $V_i$ ) in the equation:

$$k_{i,m} = \frac{V_i}{C_{\text{detected},i,m}} \quad \text{for } i = 1, \dots, j \text{ and for } m = 1, \dots, n \quad (2)$$

142 Here,  $n$  is the total number of distinct detected concentrations. This calculation resulted in  $j$  pairs  
143 of colony numbers and volumes, each associated with a specific detected concentration.



144 To approach the statistical analysis conservatively and avoid underestimating the sampling  
145 uncertainty, we selected the minimum integer of colonies ( $k_{min}$ ) along with its corresponding  
146 volume ( $V$ ). This approach minimizes the colony count to ensure the broadest possible  
147 confidence intervals for the average number of colonies per sample.

#### 148 **2.4 Estimation of *L. pneumophila* concentration from counts**

149 A discrete random variable can characterize the distribution of organisms within a specific  
150 volume of water. Assuming that these organisms are randomly distributed in the water sample,  
151 the probability of finding a specific count of organisms ( $k$ ) within a sample of known  
152 concentration ( $c$ ) and volume ( $V$ ) is given by the Poisson distribution:

$$P(k; c, V) = \frac{cV^k}{k!} \exp(-cV) \quad (3)$$

153 For a sample adhering to a Poisson distribution, the maximum likelihood estimate for the  
154 concentration ( $c$ ) is the sample arithmetic mean given by:

$$\bar{c} = \frac{\sum_{i=1}^n k_i}{\sum_{i=1}^n V_i} \quad (4)$$

155 This estimator is only valid if organisms are distributed “randomly,” i.e., the bulk solution is well  
156 mixed, and organisms are not aggregated.

#### 157 **2.5 Temporal stability of the *L. pneumophila* concentration**

158 When a series of samples is collected at a regular interval, obtained results may indicate that the  
159 concentration is stable or variable over time. To assess whether the concentration of *L.*  
160 *pneumophila* is stable over time in the cooling tower, we used a likelihood ratio test to evaluate  
161 the fit of a Poisson distribution to observed data (Haas et al., 1999). The null hypothesis of the  
162 test posits that the data set is adequately described by a single Poisson distribution with a  
163 constant concentration,  $\bar{c}$ . The likelihood of the null hypothesis is given by:

$$L^0 = \prod_{i=1}^n \frac{\bar{c} V_i^k}{k_i!} \exp(-\bar{c} V_i) \quad (5)$$

164 Conversely, the alternative hypothesis suggests that each sample has its concentration  $\bar{c}$  at the  
165 time of sampling. Therefore, the likelihood for the alternative hypothesis is:

$$L^A = \prod_{i=1}^n \frac{k_i^{k_i}}{k_i!} \exp(-k_i) \quad (6)$$

166 The test statistic ( $\Lambda$ ) can be simplified to:

$$-\ln(\Lambda) = \sum_{i=1}^n \left[ (\bar{c} V_i - k_i) - k_i \ln \left( \frac{\bar{c} V_i}{k_i} \right) \right] \quad (7)$$

167 The null hypothesis is rejected when the value of  $-2 \ln(\Lambda)$  exceed the upper  $1 - \alpha$  percentile of  
168 a  $\chi^2$  distribution with  $n - 1$  degrees of freedom. The degrees of freedom represent the difference  
169 in the number of parameters between the alternative hand null hypotheses. The error risk  $\alpha$  was  
170 set at 5%.

## 171 **2.6 Temporal variability in *L. pneumophila* concentrations**

172 Distributions of microorganisms in water are often more dispersed than what a Poisson  
173 distribution would predict; that is, the variance of the number of organisms exceeds the mean.  
174 This overdispersion relative to the Poisson distribution can result from spatial or temporal  
175 heterogeneities. This heterogeneity can be accounted for by a continuous random variable  
176 representing the concentration of each sample. The marginal distribution of the number of  
177 organisms is then obtained by the following integral:

$$P(k; c, V, \delta) = \int_0^{\infty} P_p(k; cV) h(c; \delta) dc \quad (8)$$

178 where  $h$  is a continuous distribution with parameters  $\delta$  representing the temporal variations in  
 179 concentrations. Gamma and lognormal distributions have been selected to model temporal  
 180 variations. The general properties of these distributions are presented in Table 1.

181 **Table 1.** Density functions describing the variation of a concentration  $c$ , mean, and standard deviation for  
 182 the gamma and lognormal distributions.

| Distribution                  | Density function                                                                   | Arithmetic mean                             | Standard deviation                                                    |
|-------------------------------|------------------------------------------------------------------------------------|---------------------------------------------|-----------------------------------------------------------------------|
| Gamma ( $\alpha, \beta$ )     | $\frac{\beta^\alpha}{\Gamma(\alpha)} c^{\alpha-1} e^{-\beta c}$                    | $\alpha/\beta$                              | $\alpha/\beta^2$                                                      |
| Log-normale ( $\mu, \sigma$ ) | $\frac{1}{c\sigma\sqrt{2\pi}} \exp\left[-\frac{[\ln c - \mu]^2}{2\sigma^2}\right]$ | $\exp\left(\mu + \frac{\sigma^2}{2}\right)$ | $\sqrt{\exp(\sigma^2) - 1} \exp\left(\mu + \frac{\sigma^2}{2}\right)$ |

183

## 184 2.7 Bayesian inference

185 Parameters for Poisson and mixed Poisson distributions were inferred using Bayesian models.

186 The hierarchical model structure is outlined as follows: At the first level, the observed number of  
 187 colonies per volume is distributed according to a Poisson distribution. At the second level,  
 188 concentration  $c$  is modeled as a latent variable (i.e., not directly observable) following a  
 189 continuous distribution (either gamma or log-normal for this study), making the first level  
 190 conditional on  $c$ . The hierarchical structures for Poisson-gamma and Poisson-log-normal models  
 191 are:

- 192 • Poisson gamma:  $x_i | c_i, V_i \sim \text{Poisson}(c_i V_i)$ ,  $c_i \sim \text{Gamma}(\alpha, \beta)$
- 193 • Poisson log-normal:  $x_i | c_i, V_i \sim \text{Poisson}(c_i V_i)$ ,  $c_i \sim \text{Lognormal}(\mu, \sigma)$

194 Prior distributions were chosen to ensure Markov chain stationarity while minimizing the prior  
 195 influence on the posterior distribution. A conjugate Gamma ( $\alpha, \beta$ ) prior was assigned to  
 196 parameter  $c$ , with  $\alpha$  and  $\beta$  set to 0.01. Uniform (min, max) priors were used to infer gamma  
 197 distribution parameters  $\alpha$  and  $\beta$ , with bounds set at 0 and 10 for  $\alpha$ , and  $10^{-12}$  and  $10^{-1}$  for  $\beta$ . A  
 198 uniform (min, max) prior was selected for  $\mu$ , with bounds at  $-10$  and  $10$ . An  $\exp(\lambda)$  prior was

199 allocated to  $\sigma$  as suggested by McElreath (2018), with  $\lambda$  set at 0.1, assuming the logarithm of the  
200 standard deviation was significantly below 50 for all cooling towers.

201 Models were fitted using Markov chain Monte Carlo (MCMC) simulations with rjags (v4-10) in  
202 R (v4.1.0). For each parameter, three Markov chains were run for  $10^5$  iterations following a  
203 burn-in of  $10^3$  iterations. The Brooks-Gelman-Rubin scale reduction factor was applied to assess  
204 chain convergence, and the effective sample size (the ratio of sample size to autocorrelation in  
205 Markov chains) was evaluated to ensure comprehensive exploration of the posterior distribution,  
206 deemed well-estimated at an effective size over 10,000. Brooks-Gelman-Rubin reduction factors  
207 and effective sample sizes were calculated using the diagMCMC function (Kruschke, 2014).

## 208 **2.8 Model comparison and selection**

209 The fit quality of Poisson and mixed Poisson distributions was compared using the deviance  
210 information criterion (DIC) (Spiegelhalter et al., 2002). The DIC is computed as follows:

$$DIC = \bar{D} - (\bar{D} - \hat{D}) = \bar{D} + p_D \quad (9)$$

211 where  $\bar{D}$  is the mean deviance across the sampled parameter values from the posterior  
212 distribution, and  $\hat{D}$  is a penalty term related to the risk of model overfitting. A model with a  
213 lower DIC value is considered superior. Generally, a model with a DIC at least three points  
214 lower than that of other models is significantly better (Spiegelhalter et al., 2002). For hierarchical  
215 models with a latent variable (e.g., mixed Poisson distributions), different DICs can be calculated  
216 for the model's hierarchical levels. The fit of a Poisson distribution should be assessed with a  
217 conditional DIC (cDIC), while that of a mixed Poisson distribution should be evaluated with a  
218 marginal DIC (mDIC) (Millar, 2009). The cDIC can be directly calculated using the current  
219 version of rjags in R. However, computing the mDIC is more complex as it requires integrating  
220 the likelihood function of the distribution, which cannot be done directly in rjags. Thus, mDICs

221 for mixed Poisson distributions were computed through numerical integration following the  
222 approach proposed by Quintero and Lesaffre (2018).  
223 The cooling towers were classified using a decision-making algorithm identifying the best model  
224 describing *L. pneumophila* concentrations (Fig. 1). For cooling towers where the statistical  
225 distribution of data could be validated, we computed the median value and the 95% uncertainty  
226 interval of the average *L. pneumophila* concentration predicted by the best-fit model. The  
227 analysis was conducted in R (version 4.3.0). The R code used for data analysis and visualization  
228 can be found in the GitHub repository [NOTE: URL will be provided in the final paper].

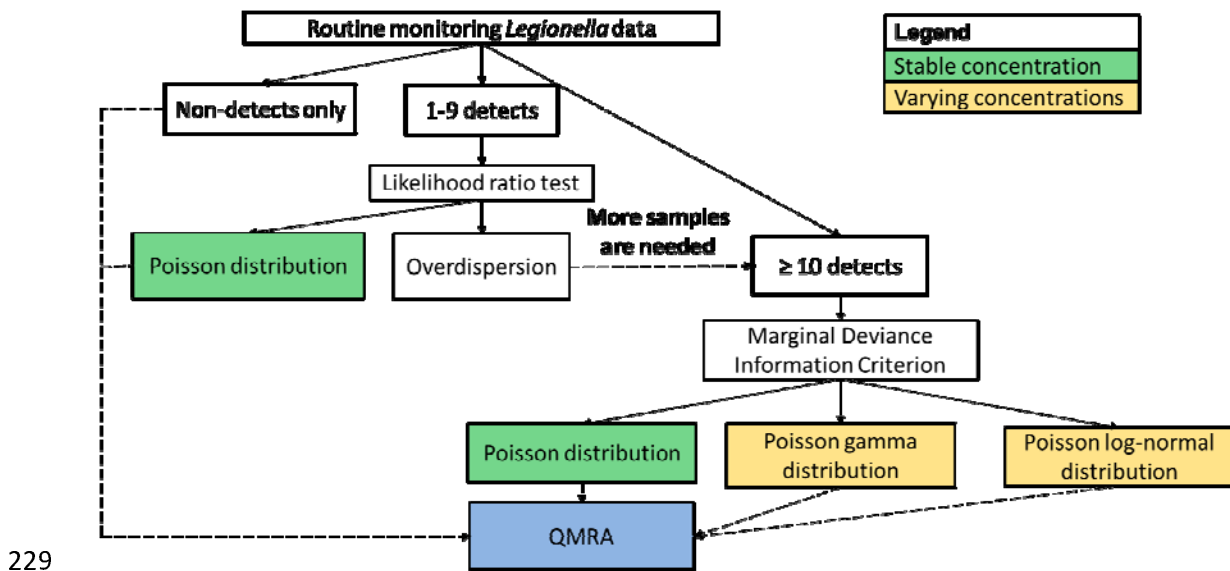

230 **Fig 1.** Decision algorithm to determine the best fit model to assess *L. pneumophila* concentrations in bulk  
231 water from a cooling tower.

## 232 2.9 Screening-level quantitative microbial risk assessment

233 To determine the dose of *L. pneumophila* that can deposit in the respiratory tract of the exposed  
234 subject, it is necessary to develop and integrate a series of sub-models that account for various  
235 stages of the process. These stages include the emission of contaminated droplets by the cooling  
236 tower, the transport and atmospheric dispersion of the droplets, the inactivation of *L.*

237 *pneumophila* during atmospheric transport, and its inhalation and deposition in the human  
238 respiratory tract (Table S1). For our screening-level QMRA, a hypothetical cooling tower was  
239 considered, characterized by an effective head of 10 m and an average recirculation flow rate of  
240  $10^3 \text{ L s}^{-1}$ . The analysis also assumes that a drift eliminator reduces evaporative water loss to  
241 0.003% of the recirculation flow rate (ASHRAE, 2008).

### 242 **2.9.1 Emission, fate, and transport of aerosol droplets discharged by the cooling tower**

243 We focused our analysis only on aerosol droplets with diameters  $\leq 150 \mu\text{m}$ , as they quickly  
244 evaporate once airborne and can be transported over long distances. To estimate the mass-  
245 weighted fraction of these aerosols, we applied the lognormal distribution of aerosol mass  
246 modelled by Peterson and Lighthart (1977) from measurements obtained at the cooling tower  
247 outlet by Shofner and Thomas (1971). For the specific fractions of *L. pneumophila* bacteria  
248 transferred from water to aerosols with a diameter of 1-10  $\mu\text{m}$ , we relied on estimates from  
249 Hamilton et al. (2018) extracted from the empirical cumulative distribution function obtained by  
250 Allegra et al. (2016). These fractions are conservative for QMRA, given that the enumeration of  
251 *L. pneumophila* bacteria for each droplet diameter was determined using a qPCR method, which  
252 measures both viable and dead cells.

253 We employed a Gaussian model to model the transport and dispersion of these aerosols. Based  
254 on results obtained at 66 meteorological stations in Quebec by Ilinca et al. (2003), we considered  
255 an arithmetic mean annual wind speed of  $4.5 \text{ m s}^{-1}$ . For environmental conditions, the Gaussian  
256 model predicts that the highest concentration of the pollutant emitted at an effective height of 10  
257 m would be observed at a distance of 110 m from the point of emission.

258 Droplets were considered as evaporated immediately upon emission from the cooling tower. To  
259 evaluate the survival of *L. pneumophila* within these evaporated aerosol droplets, we used a first-

260 order two-phase inactivation model developed from the data of Katz and Hammel (1987). This  
261 model predicts a high inactivation rate in the first 30 seconds ( $\lambda_{E1} = 0.12 \text{ s}^{-1}$ ), which then  
262 decreases ( $\lambda_{E2} = 7 \times 10^{-4} \text{ s}^{-1}$ ). Inactivation rates for aqueous aerosols are expected to be very low  
263 ( $\lambda_A \sim 1 \times 10^{-4} \text{ s}^{-1}$ ) compared to the rates for evaporated aerosols (first phase) (Hamilton et al.,  
264 2018).

### 265 **2.9.2 Inhalation, deposition of aerosols, and health effects**

266 We used deposition efficiencies for aerosols with diameters ranging from 1 to 10  $\mu\text{m}$  obtained by  
267 Heyder et al. (1986) for an oral inhalation rate of 15 L air  $\text{min}^{-1}$ , a respiratory cycle duration of 8  
268 s, and an average respiratory volume of 1 L. Our model assumed an exposure duration of one  
269 hour per day at a frequency of 365 days per year, as proposed by Hamilton et al. (2018) to assess  
270 the risks associated with residential exposure. The dose–response models developed by  
271 Armstrong and Haas (2007) based on animal data from Muller et al. (1983) and Fitzgeorge et al.  
272 (1983) were used to predict infection with subclinical severity and infection with clinical  
273 severity. Clinical severity was defined as an infection requiring medical attention or seeking  
274 health services. The health impact of a clinically severe infection was assessed using the  
275 disability-adjusted life years (DALY) factor calculated by van Lier et al. (2016) based on  
276 surveillance data for Legionnaires' disease in the Netherlands (Dijkstra et al., 2010; Dijkstra et  
277 al., 2008).

### 278 **2.9.3 Risk characterization**

279 The health outcome target corresponds to the tolerable risk associated with exposure to *L.*  
280 *pneumophila* in contaminated aerosols a cooling tower produces. Infection risks and DALYs  
281 specific to each cooling tower in the database were assessed based on the arithmetic mean  
282 concentration of *L. pneumophila* in the water, estimated by parametric modeling. Risk estimates

283 were compared to health-based targets of 1)  $10^{-4}$  infections per person per year (Macler and  
284 Regli, 1993) and 2)  $10^{-6}$  DALYs per person per year (Havelaar and Melse, 2003; World Health  
285 Organization (WHO), 2008).

### 286 **3 Results**

287 The database aggregated 105,463 monitoring results documenting *L. pneumophila*  
288 concentrations in 2,852 cooling towers from 1,960 buildings in Quebec, Canada. Empirical  
289 complementary cumulative distribution functions (CCDFs) of monitoring results grouped by  
290 year offer insights into exceedances of *L. pneumophila* concentration thresholds (Fig. 2). The  $10^4$   
291 CFU L<sup>-1</sup> threshold has a steady exceedance probability of 10% over the 2016-2020 period. The  
292 exceedance probability of the  $10^6$  CFU L<sup>-1</sup> threshold also remains constant at around 0.5% for  
293 the whole period. Notably, the  $10^7$  CFU L<sup>-1</sup> threshold is exceeded more often in 2018 than in the  
294 other years.

295 The 5-year arithmetic mean concentration and the maximum concentration for each cooling  
296 tower were computed to assess their relationship. The log-log relationship between the maximum  
297 and the arithmetic mean concentrations demonstrates that peak concentrations can substantially  
298 impact the 5-year arithmetic mean (Fig. 3). The arithmetic mean is typically about 1.0 log lower  
299 than the sample maximum.

300



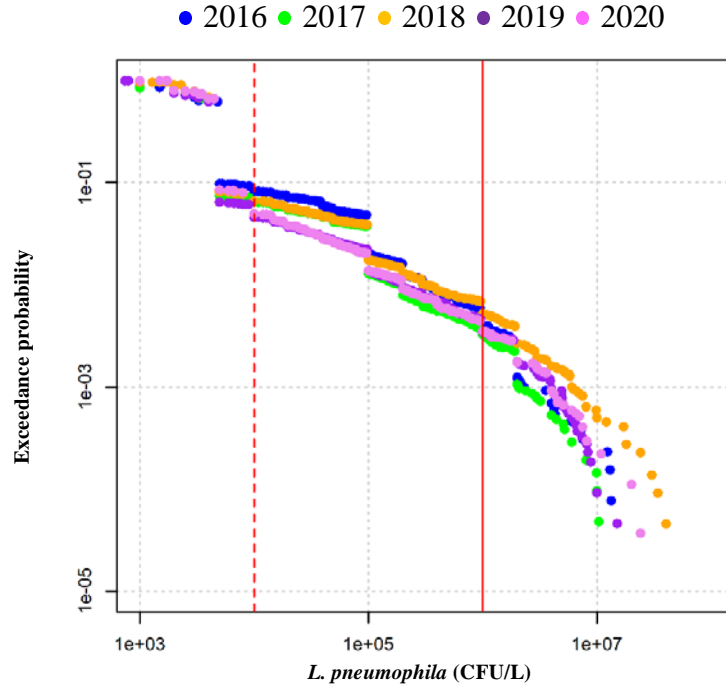

301 **Fig. 2.** Empirical complementary cumulative distribution function of *L. pneumophila* concentrations in  
302 bulk water from 2852 cooling towers in Quebec, Canada, from 2016 to 2020. The dotted and solid lines  
303 indicate concentrations of  $10^4$  and  $10^6$  CFU L<sup>-1</sup>, respectively.

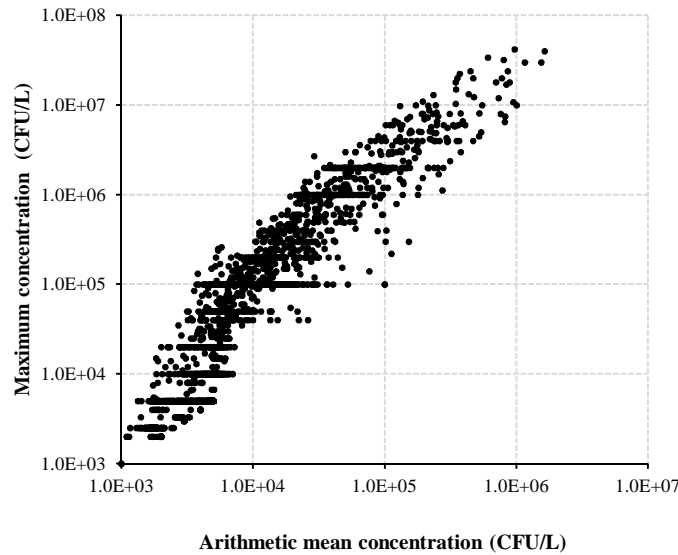

**Fig. 3.** Relationship between the sample arithmetic mean concentration and the maximum concentration of *L. pneumophila* in bulk water from 2852 cooling towers in Quebec, Canada.

304

305 For 1461 cooling towers (about half of the total), all monitoring results are non-detects (Table 2).  
306 For 1,099 cooling towers, 1 to 9 positive results are obtained. Results from the Poisson test  
307 reveal that *L. pneumophila* concentrations are statistically stable for roughly 50% of these  
308 cooling towers, equivalent to around 20% of the total. For the remaining 50%, the limited  
309 number of positive results hinders accurate parameter estimation of the Poisson Gamma and  
310 Poisson lognormal distributions. Temporal variations could be assessed for the 292 cooling  
311 towers where the positive results count is ten or more (about 10% of the total). Within this  
312 subset, the marginal deviance information criterion (mDIC) suggests the Poisson distribution as  
313 the most suitable model for ten cooling towers, indicating stable concentrations despite  
314 consistent positive findings. For the remaining 282 cooling towers, the mDIC can discriminate  
315 between the Poisson gamma and Poisson lognormal for 145 cooling towers, often favoring the  
316 Poisson lognormal. For the remainder, the mDIC indicates a similar quality of fits.

317 When results are Poisson distributed, arithmetic mean concentrations are consistently below  $10^4$   
318 CFU L<sup>-1</sup> (Table 3). Predictions from the Poisson gamma generally indicate arithmetic mean  
319 concentrations below  $10^5$  CFU L<sup>-1</sup>. Arithmetic mean concentrations surpass  $10^6$  CFU L<sup>-1</sup> in 30 of  
320 the 90 cooling towers with optimal Poisson lognormal fits. This discrepancy underscores the  
321 significant impact of distribution selection on average concentration estimates. Moreover, the  
322 span of the 95% uncertainty interval of the arithmetic mean predicted by the Poisson lognormal  
323 generally extends 1.0- to 2.0-log more than that of the Poisson gamma (Table S2, Figure 4). The  
324 CCDFs show that the predictions of the lognormal distribution can extrapolate beyond the  
325 maximum observation, unlike the gamma distribution. The uncertainty interval of the CCDF  
326 remains stable for the gamma distribution but not for the lognormal distribution, expanding as  
327 exceedance probabilities diminish. For certain cooling towers, like Cooling tower D, the CCDF

328 exhibits distinct tail behaviors at exceedance probabilities below 1% (Figure 4). In such cases,  
 329 the limited data size fails to adequately capture the upper tail's behavior, explaining the often-  
 330 similar mDICs for Poisson gamma and Poisson lognormal fits.

331 **Table 2.** Classification of cooling towers based on the decision algorithm to determine the best-fit model  
 332 to assess *L. pneumophila* concentrations in bulk water, as shown in Fig. 1. Models are the Poisson  
 333 distribution (Pois.), the Poisson gamma distribution (PGA), and the Poisson lognormal distribution  
 334 (PLN).

| Model                | No positives | 1-9 positives |          | ≥ 10 positives |      |      |                            | Total |
|----------------------|--------------|---------------|----------|----------------|------|------|----------------------------|-------|
|                      | n/a          | Pois.         | No pois. | Pois.          | PGA  | PLN  | Mixed Poisson <sup>A</sup> |       |
| Nb of cooling towers | 1461         | 552           | 547      | 10             | 55   | 90   | 137                        | 2852  |
| Fraction of total    | 51.2%        | 19.3%         | 19.1%    | 0.3%           | 1.9% | 3.1% | 4.8%                       | 100%  |

335 <sup>A</sup> Discrimination between the fit of the PGA and PLN is not possible because the difference in DIC between the two  
 336 models is less than three points.

337  
 338 **Table 3.** Classification of 844 cooling towers based on their arithmetic mean *L. pneumophila*  
 339 concentration in bulk water. The average concentration was predicted using the best-fit model determined  
 340 using the decision algorithm shown in Fig. 1. The models are the Poisson distribution, the Poisson gamma  
 341 distribution (PGA), and the Poisson lognormal distribution (PLN).

| Model                            | Arithmetic mean <i>L. pneumophila</i> concentration (CFU/L) |                                  |                                  |                   | Total      |
|----------------------------------|-------------------------------------------------------------|----------------------------------|----------------------------------|-------------------|------------|
|                                  | < 10 <sup>4</sup>                                           | 10 <sup>4</sup> -10 <sup>5</sup> | 10 <sup>5</sup> -10 <sup>6</sup> | > 10 <sup>6</sup> |            |
| Poisson (1-9 positives)          | 552 (100%)                                                  | 0 (0.0%)                         | 0 (0.0%)                         | 0 (0.0%)          | 552 (100%) |
| Poisson (≥ 10 positives)         | 10 (100%)                                                   | 0 (0.0%)                         | 0 (0.0%)                         | 0 (0.0%)          | 10 (100%)  |
| PGA                              | 11 (20.0%)                                                  | 35 (63.6%)                       | 9 (16.3%)                        | 0 (0.0%)          | 55 (100%)  |
| PLN                              | 15 (16.6%)                                                  | 26 (28.8%)                       | 19 (21.1%)                       | 30 (33.3%)        | 90 (100%)  |
| Mixed Poisson <sup>A</sup> - PGA | 81 (59.1%)                                                  | 48 (35.0%)                       | 8 (5.8%)                         | 0 (0.0%)          | 137 (100%) |
| Mixed Poisson <sup>A</sup> - PLN | 45 (32.8%)                                                  | 34 (24.8%)                       | 26 (18.9%)                       | 32 (23.3%)        | 137 (100%) |

342 <sup>A</sup> Discrimination between the fit of the PGA and PLN is not possible because the difference in DIC between the two  
 343 models is less than three points.

344

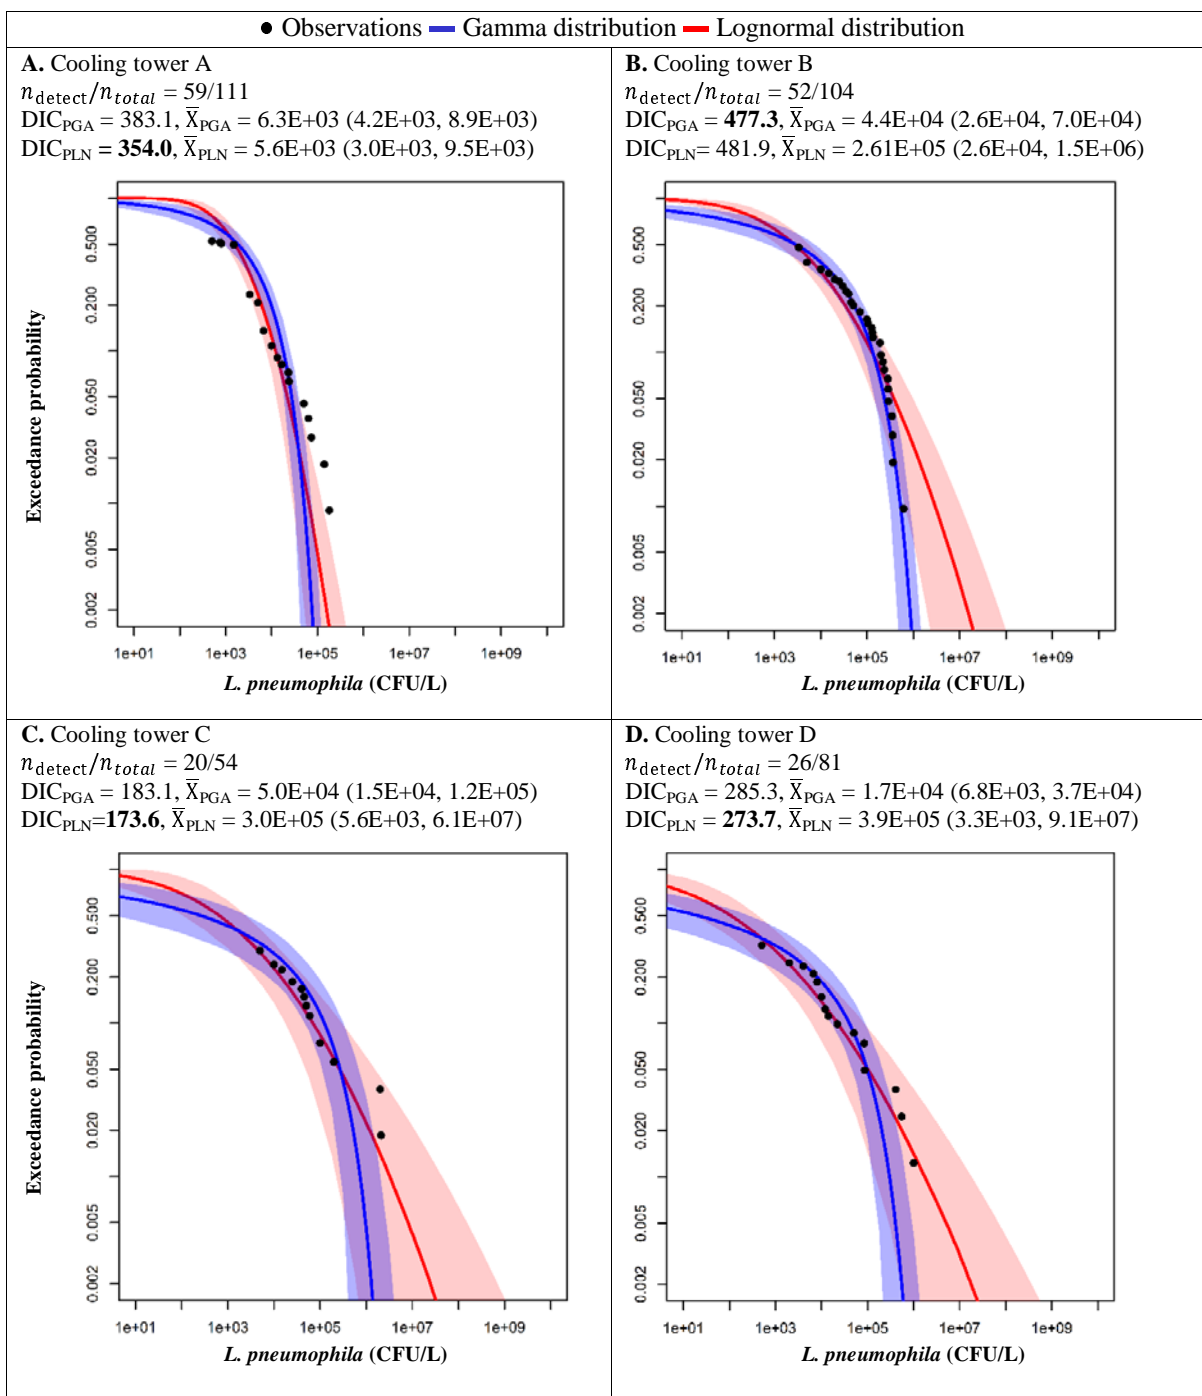

345 **Fig. 4.** Complementary cumulative distribution function of the Poisson-gamma (PGA) and Poisson  
 346 lognormal (PLN) distributions fitted to *L. pneumophila* data from four cooling towers from the Quebec  
 347 database. The dark blue and red lines represent the best fits of the gamma and lognormal  
 348 distributions, respectively. The blue and red areas represent the 95% uncertainty intervals of the gamma and lognormal  
 349 distributions, respectively. The values of the marginal deviance information criterion (mDIC) and the  
 350 arithmetic mean concentration (with 95% uncertainty interval) in the bulk water of the cooling tower  
 351 (CFU/L) predicted by each model are listed. mDICs in bold indicate the best-fit models.  
 352

353 QMRA results indicate that achieving a health-based target of  $10^{-4}$  inf./person-year requires  
 354 maintaining the arithmetic mean *L. pneumophila* concentrations below  $1.0E+03$  CFU L<sup>-1</sup> for the  
 355 subclinical infection severity model and below  $1.4E+06$  CFU L<sup>-1</sup> for the clinical infection  
 356 severity model (Table 4). The stricter health-based target of  $10^{-6}$  DALY/pers.-year results in a  
 357 critical arithmetic mean concentration of  $1.4E+04$  CFU L<sup>-1</sup>. Results from the screening-level  
 358 QMRA of 844 cooling towers are shown in Table 5. For both the arithmetic mean risk and its  
 359 97.5% uncertainty bound, this table documents the number of cooling towers that achieve the  
 360 target or not. For cooling towers where the discrimination between the Poisson gamma and  
 361 Poisson lognormal was not possible, risks were estimated for both models. Approximately 77%  
 362 of those 844 cooling towers meet the  $10^{-6}$  DALYs/pers.-year target. Using the 97.5% uncertainty  
 363 bound as an input for QMRA lowers compliance to about 70%. Among the 562 cooling towers  
 364 with stable concentration (Poisson distributed), the arithmetic mean risk and its upper uncertainty  
 365 bound are generally below targets. For the Poisson gamma, roughly half of the cooling towers  
 366 meet the  $10^{-6}$  DALYs/pers.-year. The remaining cooling towers exhibit arithmetic mean risks  
 367 about 1.0-log above this target. Risks predicted by the Poisson lognormal tend to surpass  $10^{-6}$   
 368 DALYs/pers.-year, with 60 cooling towers with risks exceeding the target by more than 2.0-log  
 369 and 137 cooling towers with the uncertainty bound exceeding the target by more than 2.0-log.

370 **Table 4.** Critical arithmetic mean *L. pneumophila* dose deposited at the alveoli and critical arithmetic  
 371 mean *L. pneumophila* concentration in water of the cooling water to achieve three different annual  
 372 health-based targets. Parameter values of the QMRA model used to calculate the doses and  
 373 concentrations are presented in Table S1.

| Health-based target                              | Average dose deposited at the alveoli (CFU) | Average <i>L. pneumophila</i> concentration in water (CFU/L) |
|--------------------------------------------------|---------------------------------------------|--------------------------------------------------------------|
| $10^{-4}$ inf./pers.-year (subclinical severity) | 4.8E-06                                     | 1.0E+03                                                      |
| $10^{-4}$ inf./pers.-year (clinical severity)    | 6.8E-03                                     | 1.4E+06                                                      |
| $10^{-6}$ DALY/pers.-year (clinical severity)    | 7.0E-05                                     | 1.4E+04                                                      |

374

375 **Table 5.** Classification of 844 cooling towers (CTs) based on their arithmetic mean infection risk and their upper uncertainty bound (97.5%) of  
 376 the arithmetic mean infection risk. Risks have been calculated using a screening-level quantitative microbial risk assessment (QMRA). Risks  
 377 are compared to three different annual health-based targets. Models are the Poisson distribution, the Poisson gamma distribution (PGA), and  
 378 the Poisson lognormal distribution (PLN).

| Model<br>(nb cooling tower)                        | Infection risk level | Arithmetic mean infection risk          |                                                         |                                         | Upper uncertainty bound (97.5%) of the arithmetic mean infection risk |                                                         |                                         |
|----------------------------------------------------|----------------------|-----------------------------------------|---------------------------------------------------------|-----------------------------------------|-----------------------------------------------------------------------|---------------------------------------------------------|-----------------------------------------|
|                                                    |                      | 10 <sup>-4</sup><br>inf./pers.-<br>year | 10 <sup>-4</sup> inf./pers.-year<br>(clinical severity) | 10 <sup>-6</sup><br>DALY/pers.-<br>year | 10 <sup>-4</sup><br>inf./pers.<br>-year                               | 10 <sup>-4</sup> inf./pers.-year<br>(clinical severity) | 10 <sup>-6</sup><br>DALY/pers.-<br>year |
| Poisson<br>1-9<br>positives<br>(552 CT)            | Target achieved      | 552                                     | 552                                                     | 552                                     | 544                                                                   | 552                                                     | 552                                     |
|                                                    | Exceeded <1.0-log    | 0                                       | 0                                                       | 0                                       | 8                                                                     | 0                                                       | 0                                       |
|                                                    | Exceeded 1.0-2.0-log | 0                                       | 0                                                       | 0                                       | 0                                                                     | 0                                                       | 0                                       |
|                                                    | Exceeded >2.0-log    | 0                                       | 0                                                       | 0                                       | 0                                                                     | 0                                                       | 0                                       |
| Poisson<br>(≥10<br>positives)<br>(10 CT)           | Target achieved      | 10                                      | 10                                                      | 10                                      | 7                                                                     | 10                                                      | 10                                      |
|                                                    | Exceeded <1.0-log    | 0                                       | 0                                                       | 0                                       | 3                                                                     | 0                                                       | 0                                       |
|                                                    | Exceeded 1.0-2.0-log | 0                                       | 0                                                       | 0                                       | 0                                                                     | 0                                                       | 0                                       |
|                                                    | Exceeded >2.0-log    | 0                                       | 0                                                       | 0                                       | 0                                                                     | 0                                                       | 0                                       |
| PGA<br>(55 CT)                                     | Target achieved      | 0                                       | 55                                                      | 20                                      | 0                                                                     | 55                                                      | 5                                       |
|                                                    | Exceeded <1.0-log    | 11                                      | 0                                                       | 29                                      | 4                                                                     | 0                                                       | 34                                      |
|                                                    | Exceeded 1.0-2.0-log | 35                                      | 0                                                       | 6                                       | 34                                                                    | 0                                                       | 16                                      |
|                                                    | Exceeded >2.0-log    | 9                                       | 0                                                       | 0                                       | 17                                                                    | 0                                                       | 0                                       |
| PLN<br>(90 CT)                                     | Target achieved      | 0                                       | 60                                                      | 20                                      | 0                                                                     | 27                                                      | 3                                       |
|                                                    | Exceeded <1.0-log    | 14                                      | 13                                                      | 23                                      | 1                                                                     | 11                                                      | 8                                       |
|                                                    | Exceeded 1.0-2.0-log | 26                                      | 6                                                       | 17                                      | 7                                                                     | 12                                                      | 16                                      |
|                                                    | Exceeded >2.0-log    | 50                                      | 11                                                      | 30                                      | 82                                                                    | 40                                                      | 63                                      |
| Mixed<br>Poisson <sup>A</sup> -<br>PGA<br>(137 CT) | Target achieved      | 1                                       | 137                                                     | 85                                      | 1                                                                     | 133                                                     | 66                                      |
|                                                    | Exceeded <1.0-log    | 79                                      | 0                                                       | 44                                      | 48                                                                    | 4                                                       | 54                                      |
|                                                    | Exceeded 1.0-2.0-log | 48                                      | 0                                                       | 8                                       | 64                                                                    | 0                                                       | 13                                      |
|                                                    | Exceeded >2.0-log    | 9                                       | 0                                                       | 0                                       | 24                                                                    | 0                                                       | 4                                       |
| Mixed<br>Poisson <sup>A</sup> -<br>PLN<br>(137 CT) | Target achieved      | 3                                       | 107                                                     | 52                                      | 1                                                                     | 62                                                      | 19                                      |
|                                                    | Exceeded <1.0-log    | 42                                      | 12                                                      | 34                                      | 13                                                                    | 17                                                      | 22                                      |
|                                                    | Exceeded 1.0-2.0-log | 34                                      | 10                                                      | 21                                      | 23                                                                    | 4                                                       | 22                                      |
|                                                    | Exceeded >2.0-log    | 58                                      | 8                                                       | 30                                      | 100                                                                   | 54                                                      | 74                                      |

379 <sup>A</sup> Discrimination between the fit of the PGA and PLN is not possible because the difference in DIC between the two models is less than three points.

## 380 **4 Discussion**

### 381 **4.1 Evolution of *L. pneumophila* concentration exceedance rates in Quebec**

382 In Quebec, the period from July 2014 to June 2017 saw a documented decrease in  
383 exceedance rates of  $10^4$  CFU L<sup>-1</sup> for approximately 300 cooling towers (Racine et al.,  
384 2019), coinciding with the introduction of the new regulation (Gouvernement du Québec,  
385 2014). The average annual exceedance rate decreased from 15% in 2014-2015 to 9% in  
386 2016-2017. For the 2016-2020 period, our results indicate similar exceedance rates of  
387 about 10% for concentrations of  $10^4$  CFU L<sup>-1</sup> for the combined results of the 2852 cooling  
388 towers included in the database. The exceedance rates for concentrations of  $10^5$  CFU L<sup>-1</sup>  
389 and  $10^6$  CFU L<sup>-1</sup> also remained stable during this period, except for a notable increase in  
390 the exceedance rate of  $10^7$  CFU L<sup>-1</sup> in 2018. This increase may have been influenced by  
391 the extreme heat waves of summer 2018, potentially leading to increased cooling tower  
392 usage and operating conditions favorable to *L. pneumophila* growth. That summer was  
393 recorded as the hottest in 146 years of meteorological observations in southern Quebec  
394 (Lebel et al., 2019). Analyzing risk factors, such as air temperature, humidity level, and  
395 precipitation, could provide insights into the conditions that resulted in these extreme  
396 concentrations. Overall, the introduction of Quebec's regulation appears to have initially  
397 reduced the high concentrations of *L. pneumophila* in Quebec's cooling towers but did  
398 not reduce the exceedance rates of  $10^4$  CFU L<sup>-1</sup> to the lower values of around 1% found in  
399 the Canadian federal cooling tower databases (data not shown). Gathering specific  
400 information on the water treatment strategies used in these cooling towers, including the  
401 types of biocides, application frequencies, and dosages, could shed light on the causes of  
402 the differences observed between these datasets.

#### 403 **4.2 Variations in *L. pneumophila* concentrations in cooling towers over five years**

404 To assess temporal variations in *L. pneumophila* concentrations in cooling towers, three  
405 discrete parametric distributions — Poisson, Poisson gamma, and Poisson lognormal —  
406 were proposed. We chose these discrete distributions to avoid replacing non-detects with  
407 a specific concentration (e.g., one organism per analyzed volume). Instead, we treated the  
408 sample concentration as a random variable that can be estimated using a Poisson  
409 distribution. This approach requires knowledge of the number of CFUs and the water  
410 volume analyzed per sample. However, laboratories do not typically report this critical  
411 information. We introduced a method to estimate the number of CFUs and the analyzed  
412 volume of each sample from reported concentrations, although the potential bias in these  
413 estimates could not be assessed. A direct comparison between the fit of these  
414 distributions to actual and estimated results would provide insights into the limitations of  
415 our approach. Ideally, laboratories should report raw data (i.e., the number of CFUs and  
416 the analyzed volume) to facilitate modelling of temporal variations for risk assessment.

417 We developed an algorithm to identify the best modelling approach based on monitoring  
418 results. Using a goodness-of-fit test for the Poisson distribution, we determined whether  
419 the concentration was statistically stable or variable in cooling towers when at least one  
420 positive result was recorded. The distribution of microorganisms in water typically  
421 exhibits more dispersion than the Poisson distribution predicts, meaning that the variance  
422 of organism counts exceeds their average number. Our analysis attributed overdispersion  
423 relative to the Poisson distribution solely to temporal variations in concentrations. Yet,  
424 other heterogeneity sources — such as organism aggregation in samples or variable  
425 recovery rates from enumeration methods — can also contribute to overdispersion (Haas



426 and Heller, 1986). Although these other heterogeneity sources have not been analyzed for  
427 *L. pneumophila*, they are well-documented for other bacteria (El-Shaarawi et al., 1981;  
428 Haas and Heller, 1986; Pipes et al., 1977). Examining subsamples from individual water  
429 samples from cooling towers could elucidate the impact of *L. pneumophila* aggregation  
430 on concentration variation.

431 Gamma et lognormal distributions were chosen as mixture distributions to characterize  
432 temporal variations in *L. pneumophila* concentrations. The theoretical foundation for  
433 selecting these distributions lies in their ability to approximate random variations in  
434 population size, constrained by an environmental carrying capacity. The gamma  
435 distribution can be derived from population growth following the logistic function  
436 (Dennis and Patil, 1984), while the lognormal distribution emerges from the Gompertz  
437 function (Dennis and Patil, 1988). Both logistic and Gompertz models yield sigmoid  
438 functions representing population growth in three stages: initial slow growth, followed by  
439 optimal growth, which eventually slows down as the population approaches its carrying  
440 capacity. However, the Gompertz curve tapers off more gradually than the logistic curve.  
441 Thus, the lognormal distribution may indicate that *L. pneumophila* has not reached its  
442 carrying capacity, whereas the gamma distribution suggests that the carrying capacity has  
443 been reached. This carrying capacity might be affected by operational factors, including  
444 water treatment practices and the efficacy of interventions following regulatory threshold  
445 exceedances. Our analysis reveals that neither the gamma nor the lognormal distribution  
446 consistently outperforms the other in predicting variations. Identifying the most accurate  
447 model was not possible for many cooling towers, likely due to limited sample sizes.

448 When discrimination between the gamma and lognormal is not feasible, we recommend  
449 selecting the lognormal to conservatively predict peak concentrations.

### 450 **4.3 Challenges in monitoring *L. pneumophila* concentrations in cooling towers**

451 Using static parametric distributions for modelling *L. pneumophila* concentrations  
452 assumes the stochastic process is stationary (i.e., the process's structure is constant over  
453 time) and ergodic (i.e., the sample size is sufficiently large to reflect the process's  
454 structure). However, fulfilling these conditions in cooling towers presents challenges. A  
455 shift in the average concentration due to changes in water treatment may render the  
456 process non-stationary, potentially requiring different analyses for pre- and post-  
457 intervention data. Additionally, our findings reveal that monthly monitoring over five  
458 years may not adequately represent the process. This is evidenced by the considerable  
459 parametric uncertainty in the *L. pneumophila* concentration distribution of some cooling  
460 towers. This result highlights the importance of accounting for short-term variations to  
461 predict public health risks. The causes of these fluctuations, such as *L. pneumophila*  
462 growth events or biofilm detachment, remain uncertain, limiting precise  
463 recommendations for monitoring. Nevertheless, our analysis suggests that the monitoring  
464 guidelines and regulations require revision for the risk management of high-risk cooling  
465 towers (e.g., those exceeding the  $10^4$  CFU L<sup>-1</sup> threshold). A more frequent monitoring  
466 interval, potentially bi-weekly or weekly, notably during periods of higher risk like  
467 warmer months, could be key to managing public health risks associated with these  
468 cooling towers.

#### 469 **4.4 Advancing QMRA for systems with high variability**

470 QMRA was initially developed to predict health risks associated with enteric pathogen  
471 concentrations in surface water. In such systems, the variability in concentrations is  
472 generally low enough to accurately estimate the long-term average pathogen  
473 concentration with low-frequency (e.g., monthly) monitoring over a set period (e.g., two  
474 years) (USEPA, 2010). Evaluating compliance with an annual health-based target can  
475 make sense for these systems. However, for systems with higher variability in pathogen  
476 concentrations, such as *L. pneumophila* in cooling towers, demonstrating compliance  
477 with an annual health-based target may not be feasible. For such systems, a short-term  
478 health-based risk target may be preferable, as previously recommended for drinking  
479 water safety management by Signor and Ashbolt (2009). Our reverse-QMRA model  
480 indicates the critical annual average concentration of *L. pneumophila* should be  $1.4 \times 10^4$   
481 CFU L<sup>-1</sup> to achieve a health-based target of  $10^{-6}$  DALY/pers.-year, aligning closely with  
482 Quebec's threshold of  $10^4$  CFU L<sup>-1</sup>. Although the Quebec regulatory threshold was  
483 established “per sample,” our findings demonstrate that concentrations exceeding  $10^4$   
484 CFU L<sup>-1</sup> can substantially increase the annual average concentration. Therefore,  
485 maintaining “per sample” concentrations below  $10^4$  CFU L<sup>-1</sup> could be an effective  
486 strategy for managing short-term clinical infection risks.

487 Adopting a short-term risk target could significantly impact how monitoring strategies  
488 are developed. For a “per sample” strategy to work, the monitoring frequency must be  
489 statistically valid, ensuring concentrations consistently remain below the set threshold  
490 with a defined confidence level. This approach demands detailed statistical analyses to  
491 determine the necessary monitoring frequency to capture *Legionella* growth, bloom, and

492 sloughing events, as recommended by National Academies of Sciences and Medicine  
493 (2020). The validity of a risk-based threshold also depends on the assumptions  
494 underlying the QMRA model. Our study's assumptions largely align with those of  
495 Hamilton et al. (2018). We diverged in assuming negligible reflection of viable bacteria  
496 from surfaces. Also, we found a fraction of aerosol mass with diameters of 100  $\mu\text{m}$  or  
497 smaller of 17%, based on the distribution of Peterson and Lighthart (1977), which is  
498 above the 1.4% reported by Hamilton et al. (2018). Assessing aerosol mass distributions  
499 emitted by more recently constructed cooling towers could enhance the accuracy of  
500 exposure models.

#### 501 **4.5 Proactive strategies to reduce *L. pneumophila* exceedance thresholds**

502 Under Quebec's regulations, exceeding the  $10^4$  CFU L<sup>-1</sup> threshold requires identifying the  
503 causes of the increase, implementing corrective measures, and assessing the efficacy of  
504 these measures. However, the effectiveness of these interventions appears limited, given  
505 the recurring exceedances of the  $10^4$  CFU L<sup>-1</sup> and  $10^6$  CFU L<sup>-1</sup> thresholds since 2016. To  
506 address this issue, adopting high-frequency *L. pneumophila* monitoring following  
507 exceedances could enable early detection of peak concentrations, allowing for a better  
508 evaluation of the corrective measures. The implementation of comprehensive water  
509 management plans could shift focus from reactive to preventive measures, potentially  
510 reducing costs and resources associated with frequent monitoring following threshold  
511 exceedances.

## 512 **5 Conclusions**

513 The analysis of an regulatory database, including *L. pneumophila* concentrations  
514 monitored monthly from 2,852 cooling towers across Quebec, Canada, between 2016 and  
515 2020, led to the following conclusions:

- 516 • The analysis of the 105,463 monitoring results shows that exceedance rates of the  
517  $10^4$  and the  $10^6$  CFU L<sup>-1</sup> thresholds have remained constant at 10% and 0.5%,  
518 respectively. While the implementation of Quebec regulations in 2014 initially  
519 reduced threshold exceedances, this trend was not sustained from 2016 to 2020.  
520 Establishing validation procedures for corrective actions to prevent recurring  
521 threshold exceedances could be an effective risk management strategy to address  
522 this issue.
- 523 • For the 2,852 cooling towers, 51.2% reported exclusively non-detects, 38.5%  
524 reported between one to nine positives, and 10.2% recorded more than ten  
525 positives. For this latter group, site-specific temporal variations in concentrations  
526 of *L. pneumophila* were often well described by either the gamma or the  
527 lognormal distribution. Due to the distinct behaviors of their upper tails, these  
528 distributions predicted considerably divergent arithmetic mean concentrations for  
529 some data sets. Implementing rigorous model comparison and selection  
530 approaches is essential to reliably predict peak concentrations.
- 531 • Our screening-level QMRA model suggests that maintaining a yearly average *L.*  
532 *pneumophila* concentration of  $1.4 \times 10^4$  CFU L<sup>-1</sup> or lower is necessary to achieve  
533 a health-based target of  $10^{-6}$  DALY/pers.-year for infections of clinical severity.  
534 QMRA identified 137 cooling towers at risk of exceeding this health-based target,

535 primarily because of observed or predicted concentrations above  $10^5$  CFU L<sup>-1</sup>.  
536 Therefore, maintaining “per sample” concentrations below  $10^4$  CFU L<sup>-1</sup> could be  
537 an effective strategy for managing short-term clinical infection risks. Increasing  
538 the monitoring frequency would be necessary to enhance the identification and  
539 mitigation of *L. pneumophila* growth periods in these cooling towers.

540 Detailed information on water treatment practices at cooling towers (e.g., biocide types,  
541 application frequencies, and dosages) would be valuable in investigating design and  
542 operational factors contributing to *L. pneumophila* proliferation within cooling towers.

543

544 **6 Acknowledgments**

545 This study was funded by the Natural Sciences and Engineering Research Council of  
546 Canada (NSERC) through the Industrial Chair on Drinking Water to M.P. Alliance Grant  
547 ALLRP 545363-19 to M.P., E.B. and Discovery grant RGPIN-2021-04341 to M.P.

548 The Alliance grant is funded by NSERC (66%) under the Alliance collaborative research  
549 partnership program and cofunded by Public Service and Procurement Canada, Régie du  
550 Batiment du Québec, Société Québécoise des Infrastructures, Centre d'expertise en  
551 analyse environnementale du Québec du ministère de l'Environnement, de la Lutte contre  
552 les changements climatiques, de la Faune et des Parcs, Bioalert solutions, and IDEXX.

553 We would like to thank Suzel Bourdeau from Régie du Batiment du Québec (RBQ),  
554 Carol-Ann Roy from Société Québécoise des Infrastructures (SQI), Jeff Moffat, and  
555 Clayton Truax from Public Services and Procurement Canada (PSPC) for providing us  
556 with these databases. We also thank Manuela Villion from Centre d'expertise en analyse  
557 environnementale du Québec du ministère de l'Environnement (CEAEQ) for assisting us  
558 in interpreting the data. Finally, we would like to thank Marwan Chacrone for his  
559 contribution to the analysis of the databases.

560

## 561 7 References

- 562 Allegra, S., Leclerc, L., Massard, P.A., Girardot, F., Riffard, S. and Pourchez, J. 2016.  
563 Characterization of aerosols containing *Legionella* generated upon nebulization.  
564 Scientific reports 6, 33998.
- 565 Armstrong, T.W. and Haas, C.N. 2007. A quantitative microbial risk assessment model  
566 for legionnaires' disease: Animal model selection and dose-response modeling.  
567 Risk Anal 27(6), 1581-1596.
- 568 ASHRAE (2008) 2008 ASHRAE Handbook--HVAC Systems and Equipment (IP): IP  
569 Edition (includes CD in Dual Units, American Society of Heating Refrigerating &  
570 Air Conditioning Engineers ....
- 571 ASHRAE 2018 Legionellosis: Risk management for building water systems, p. 24,  
572 Atlanta, GA, USA.
- 573 ASHRAE 2020 Guideline 12-2000, Managing the risk of legionellosis associated with  
574 building water systems, p. 60, Atlanta, GA, USA.
- 575 Centre d'expertise en analyse environnementale du Québec 2022 Protocole  
576 d'échantillonnage de l'eau du circuit des tours de refroidissement pour la  
577 recherche des légionelles, Quebec, Canada.
- 578 Chik, A.H.S., Schmidt, P.J. and Emelko, M.B. 2018. Learning something from nothing:  
579 the critical importance of rethinking microbial non-detects. Frontiers in  
580 microbiology 9, 2304.
- 581 Cooling Technology Institute (CTI) 2000 Legionellosis guideline: best practices for  
582 control of Legionella, pp. 1-9.
- 583 Dennis, B. and Patil, G. 1988 Applications in ecology. Chapter 12 in EL Crow and K.  
584 Shimizu, editors. Lognormal distributions: theory and applications, Marcel  
585 Dekker, New York, New York, USA.
- 586 Dennis, B. and Patil, G.P. 1984. The gamma distribution and weighted multimodal  
587 gamma distributions as models of population abundance. Mathematical  
588 Biosciences 68(2), 187-212.
- 589 Dijkstra, F., van't Klooster, T., Brandsema, P., van Gageldonk-Lafeber, A., Meijer, A.  
590 and van der Hoek, W. 2010. Jaarrapportage surveillance respiratoire  
591 infectieziekten 2009. RIVM briefrapport 210231006.
- 592 Dijkstra, F., van Gageldonk-Lafeber, A., Brandsema, P., Friesema, I., van der Lubben, I.,  
593 Wilbrink, B., Meijer, A., van der Hoek, W. and van der Sande, M. 2008.  
594 Jaarrapportage respiratoire infectieziekten 2007/2008. RIVM briefrapport  
595 210231003.
- 596 El-Shaarawi, A., Esterby, S. and Dutka, B. 1981. Bacterial density in water determined  
597 by Poisson or negative binomial distributions. Applied and Environmental  
598 Microbiology 41(1), 107-116.
- 599 Fitzgeorge, R., Baskerville, A., Broster, M., Hambleton, P. and Dennis, P. 1983.  
600 Aerosol infection of animals with strains of *Legionella pneumophila* of different  
601 virulence: comparison with intraperitoneal and intranasal routes of infection.  
602 Epidemiology & Infection 90(1), 81-89.
- 603 Gouvernement du Québec 2014 Décret 454-2014, 21 mai 2014. Règlements et autres  
604 actes. Loi sur le bâtiment (chapitre B-1.1). Code de sécurité modification  
605 concernant le Règlement modifiant le Code de sécurité, p. 5, Gazette officielle du  
606 Québec, 28 mai 2014, 146e année, n<sup>o</sup> 22, Québec, Canada.



- 607 Haas, C.N. and Heller, B. 1986. Statistics of enumerating total coliforms in water  
608 samples by membrane filter procedures. *Water Research* 20(4), 525-530.
- 609 Haas, C.N., Rose, J.B. and Gerba, C.P. (1999) Quantitative microbial risk assessment,  
610 John Wiley and Sons, Inc., New York, USA.
- 611 Hamilton, K.A., Hamilton, M.T., Johnson, W., Jjemba, P., Bukhari, Z., LeChevallier, M.  
612 and Haas, C.N. 2018. Health risks from exposure to *Legionella* in reclaimed  
613 water aerosols: Toilet flushing, spray irrigation, and cooling towers. *Water  
614 research* 134, 261-279.
- 615 Hardy, R., Schilling, K., Fromm, J., Dai, X. and Cook, M. 2006. Technical background  
616 document: microbial risk assessment and fate and transport modeling of  
617 aerosolized microorganisms at wastewater land application facilities in Idaho.  
618 Idaho Department of Environmental Quality, Boise, ID.
- 619 Havelaar, A.H. and Melse, J.M. 2003 Quantifying public health risk in the WHO  
620 guidelines for drinking-water quality: a burden of disease approach, p. 49, World  
621 Health Organization (WHO).
- 622 Heyder, J., Gebhart, J., Rudolf, G., Schiller, C.F. and Stahlhofen, W. 1986. Deposition  
623 of particles in the human respiratory tract in the size range 0.005–15  $\mu\text{m}$ . *Journal  
624 of aerosol science* 17(5), 811-825.
- 625 Ilinca, A., McCarthy, E., Chaumel, J.-L. and Rétiveau, J.-L. 2003. Wind potential  
626 assessment of Quebec Province. *Renewable energy* 28(12), 1881-1897.
- 627 Katz, S.M. and Hammel, J.M. 1987. The effect of drying, heat, and pH on the survival  
628 of *Legionella pneumophila*. *Annals of Clinical & Laboratory Science* 17(3), 150-  
629 156.
- 630 Kim, B., Anderson, J., Mueller, S., Gaines, W. and Kendall, A. 2002. Literature  
631 review—efficacy of various disinfectants against *Legionella* in water systems.  
632 *Water research* 36(18), 4433-4444.
- 633 Kruschke, J.K. (2014) *Doing Bayesian data analysis : A tutorial with R, JAGS, and Stan*,  
634 Amsterdam Academic Press.
- 635 Kusnetsov, J.M., Martikainen, P.J., Jousimies-Somer, H.R., Väisänen, M.-L., Tulkki,  
636 A.I., Ahonen, H.E. and Nevalainen, A.I. 1993. Physical, chemical and  
637 microbiological water characteristics associated with the occurrence of *Legionella*  
638 in cooling tower systems. *Water Research* 27(1), 85-90.
- 639 Lebel, G., Dubé, M. and Bustinza, R. 2019. Surveillance des impacts des vagues de  
640 chaleur extrême sur la santé au Québec à l'été 2018. *Bulletin d'information en  
641 santé environnementale*. Institut national de santé publique du Québec. Retrieved  
642 from [www.inspq.qc.ca/bise/surveillance-des-impacts-des-vagues-de-chaleur-  
643 extreme-sur-lasante-au-quebec-l-ete-2018](http://www.inspq.qc.ca/bise/surveillance-des-impacts-des-vagues-de-chaleur-extreme-sur-lasante-au-quebec-l-ete-2018).
- 644 Macler, B.A. and Regli, S. 1993. Use of microbial risk assessment in setting US  
645 drinking water standards. *International journal of food microbiology* 18(4), 245-  
646 256.
- 647 Masago, Y., Oguma, K., Katayama, H., Hirata, T. and Ohgaki, S. 2004.  
648 *Cryptosporidium* monitoring system at a water treatment plant, based on  
649 waterborne risk assessment. *Water Science and Technology* 50(1), 293-299.
- 650 Millar, R.B. 2009. Comparison of hierarchical Bayesian models for overdispersed count  
651 data using DIC and Bayes' factors. *Biometrics* 65(3), 962-969.

- 652 Muller, D., Edwards, M.L. and Smith, D.W. 1983. Changes in iron and transferrin levels  
653 and body temperature in experimental airborne legionellosis. *Journal of Infectious*  
654 *Diseases* 147(2), 302-307.
- 655 National Academies of Sciences, E. and Medicine (2020) Management of Legionella in  
656 water systems, National Academies Press.
- 657 Paniagua, A.T., Paranjape, K., Hu, M., Bedard, E. and Faucher, S.P. 2020. Impact of  
658 temperature on Legionella pneumophila, its protozoan host cells, and the  
659 microbial diversity of the biofilm community of a pilot cooling tower. *Science of*  
660 *the total environment* 712, 136131.
- 661 Peterson, E.W. and Lighthart, B. 1977. Estimation of downwind viable airborne  
662 microbes from a wet cooling tower—Including settling. *Microbial ecology* 4(1),  
663 67-79.
- 664 Pipes, W.O., Ward, P. and Ahn, S.H. 1977. Frequency distributions for coliform  
665 bacteria in water. *Journal American Water Works Association* 69(12), 664-668.
- 666 Quintero, A. and Lesaffre, E. 2018. Comparing hierarchical models via the marginalized  
667 deviance information criterion. *Stat Med* 37(16), 2440-2454.
- 668 Racine, P., Elliott, S. and Betts, S. 2019. Legionella Regulation, Cooling Tower  
669 Positivity and Water Quality in the Quebec Context. *ASHRAE Transactions* 125.
- 670 Radziminski, C. and White, P. 2023. Cooling tower Legionella pneumophila  
671 surveillance results: Vancouver, Canada, 2021. *Journal of Water and Health*  
672 21(3), 313-328.
- 673 Shofner, F.M. and Thomas, C.O. (1971) Development and Demonstration of Low-level  
674 Drift Instrumentation, US Environmental Protection Agency.
- 675 Signor, R. and Ashbolt, N. 2009. Comparing probabilistic microbial risk assessments for  
676 drinking water against daily rather than annualised infection probability targets.  
677 *Journal of water and health* 7(4), 535-543.
- 678 Spiegelhalter, D.J., Best, N.G., Carlin, B.R. and van der Linde, A. 2002. Bayesian  
679 measures of model complexity and fit. *Journal of the Royal Statistical Society*  
680 *Series B-Statistical Methodology* 64, 583-616.
- 681 Teunis, P.F.M., Medema, G.J., Kruidenier, L. and Havelaar, A.H. 1997. Assessment of  
682 the risk of infection by Cryptosporidium or Giardia in drinking water from a  
683 surface water source. *Water Research* 31(6), 1333-1346.
- 684 Türetgen, I. and Cotuk, A. 2007. Monitoring of biofilm-associated Legionella  
685 pneumophila on different substrata in model cooling tower system. *Environmental*  
686 *monitoring and assessment* 125, 271-279.
- 687 USEPA (2010) Long term 2 enhanced surface water treatment rule toolbox guidance  
688 manual, US Environmental Protection Agency, Office of Water.
- 689 Van Kenhove, E., Dinne, K., Janssens, A. and Laverge, J. 2019. Overview and  
690 comparison of Legionella regulations worldwide. *American journal of infection*  
691 *control* 47(8), 968-978.
- 692 van Lier, A., McDonald, S.A., Bouwknegt, M., group, E., Kretzschmar, M.E., Havelaar,  
693 A.H., Mangen, M.-J.J., Wallinga, J. and de Melker, H.E. 2016. Disease burden  
694 of 32 infectious diseases in the Netherlands, 2007-2011. *PloS one* 11(4),  
695 e0153106.

- 696 World Health Organization (WHO) 2008 Guidelines for drinking water-quality. Third  
697 Edition incorporating the First and Second addenda Edition (Volume 1).  
698 Recommendations, p. 668, Geneva, Switzerland.  
699 World Health Organization (WHO) (2011) Water safety in buildings.

700
